# Supplementary material for: Cohort profile: improving treatment of HIV-infected Ethiopian children through better detection of treatment failure in southern Ethiopia
Source: PubMed Central journal article supplement — BMJ Open. 2017 Feb 28;7(2):e013528. doi: 10.1136/bmjopen-2016-013528 (PMC5337744; doi:10.1136/bmjopen-2016-013528), 2017-02-28
Supplement: bmjopen-2016-013528supp.pdf [file bmjopen-2016-013528supp.pdf]

# Enrolment baseline

Study ID (Initials of the hospital and MRN)

---

Study ID (Hospital Initials and MRN)

---

Date of enrollment

---

(YYYY-MM-DD)

Upload the patient's consent form

---

---

## CONTACT INFORMATION & DEMOGRAPHIC DATA

First Name

---

Father's Name

---

Address (Region, Wereda, Kebele)

---

Phone number

---

Date of birth

---

Child's age at enrollment (years)

---

(age at enrollment in years)

What is the family size?

---

What is the average monthly income for the family?

---

Does the family have external support?

- Yes  
 No

If the family has external support, what source is it?

- Government  
 NGO  
 Charity  
 Other

What is the occupation of the caregivers?

- Farmers  
 Jobless  
 Government Employees  
 Merchants  
 Daily Laborers  
 Other

What is the educational status of the mother?

- Didn't attend School  
 Attended some school, didn't complete primary  
 Read/Write, no formal school  
 Completed Primary Education  
 Completed Secondary Education  
 Completed Tertiary Education

What is the educational status of the Father?

- Didn't attend School  
 Attended some school, didn't complete primary  
 Read/Write, no formal school  
 Completed Primary Education  
 Completed Secondary Education  
 Completed Tertiary Education

Are you worried about stigma and discrimination at your locality because of HIV?

- Yes  
 No

Are there other siblings who have HIV?

- Yes  
 No

Are there other siblings who died of HIV?

- Yes  
 No

Date of HIV diagnosis of the child

\_\_\_\_\_

Was DNA PCR done?

- Yes  
 No

What was the DNA PCR result?

- Positive  
 Negative  
 Unknown

What was the mode of feeding during early childhood?

- Exclusive breast feeding for 6 months then complementary  
 Exclusive Formula Feeding  
 Mixed  
 I don't remember/don't know

Ethnicity

- Amhara  Oromo  Sidama  Wolaita  Tigray  Gurage  Silte  Gamo  
 Other

If other for the above question, describe.

\_\_\_\_\_

What is the sex of the child?

- Female  
 Male

---



---

## CLINICAL CONDITION

Height

\_\_\_\_\_ (height/length in cm (xxx,x cm))

Weight

\_\_\_\_\_ (xx,x kilograms)

Mid upper arm circumference

\_\_\_\_\_

BMI

\_\_\_\_\_

Head Circumference (up to 5 years)

\_\_\_\_\_ (xx,x cm)

Pitting Edema

- Yes  
 No

Hair change (reddish/greyish, sparse, plaquable)

- Yes  
 No

Visible severe wasting

- Yes  
 No

Kwashiorkor Dermatitis

- Yes  
 No

Did the child take ART prophylaxis immediately after birth?

- Yes  
 No  
 Unknown

What was given?

\_\_\_\_\_

For how long did s/he take the prophylaxis?

\_\_\_\_\_

## CHILD ART INFO

When was ART initiated (date)?

\_\_\_\_\_

What was the age of the child at ART initiation?

\_\_\_\_\_

What is the ART regimen?

- AZT, 3TC, EFV  
 AZT, 3TC, NVP  
 D4T, 3TC, EFV  
 D4T, 3TC, NVP  
 TDF, 3TC, EFV/NVP  
 AZT/D4T, 3TC, PI  
 ABC, 3TC, NVP/EFV/PI

WHO stage at ART start (from record/card)

- WHO Stage 1  
 WHO Stage 2  
 WHO Stage 3  
 WHO Stage 4

What was the CD4 Percent at Initiation ?

\_\_\_\_\_

What was the absolute CD4 count at initiation?

\_\_\_\_\_

Was Viral Load done at Initiation or before?

- Yes  
 No

If Viral Load was done, what was the value?

\_\_\_\_\_

How long after diagnosis was ART initiated?

\_\_\_\_\_

Duration on ART (in months)

\_\_\_\_\_

Was there any substitution of ART drugs?

- Yes  
 No

What was the substitution that was done?

\_\_\_\_\_

What was the reason for substitution?

- Toxicity and drug side effects  
 Tuberculosis Co-infection  
 National Guideline Change  
 Other

If other for the above question, describe.

\_\_\_\_\_

**CAREGIVER INFO**

Who is the caregiver for the child/ who is the child living with?

- Mother and Father
- Mother
- Father
- Relative or Sibling
- Foster care
- Grandmother
- Other

Describe if 'other' for the above question:

\_\_\_\_\_

Are biological parents alive?

- Yes both alive
- Yes- only mother alive
- Yes- only father alive
- No, both died

Is the caregiver HIV positive?

- Yes
- No

Are caregivers on HIV care follow up?

- Yes
- No
- Unknown

Is caregiver on ART?

- Yes
- No

What is the ART regimen that the caregiver is taking?

\_\_\_\_\_

Was the mother taking prophylaxis during pregnancy?

- Yes
- No
- Unknown

If yes, what was she taking (please check with the mothers records)?

\_\_\_\_\_

What is the level of adherence of the caregiver to care and treatment?

0% means they have taken none  
50% means they have taken half  
100% means they have taken every single dose

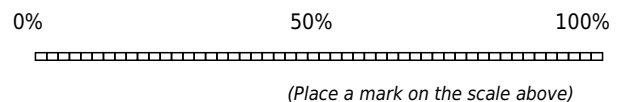

Ask the patient: over the past month, how often has your child taken their HIV medication?

0% means they have taken none  
50% means they have taken half  
100% means they have taken every single dose

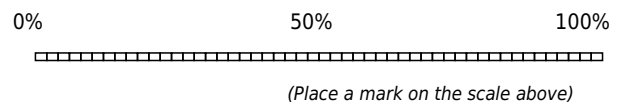

How many doses of their HIV medication has your child missed over the past week?

\_\_\_\_\_

Is the child currently prescribed PCP prophylaxis (bactrim/dapson)?

- Yes
- No

Over the past month, how often have you taken your PCP prophylaxis?

0% means they have taken none

50% means they have taken half

100% means they have taken every single dose

0% 50% 100%

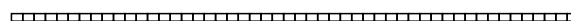

(Place a mark on the scale above)

How many doses of their PCP prophylaxis has your child missed over the last week?

\_\_\_\_\_

If caregiver is on ART, was he/she diagnosed to have treatment failure at some point? (please check records if needed)

- Yes  
 No  
 Unknown

## TUBERCULOSIS INFORMATION

Was the child diagnosed for TB previously?

- Yes  
 No

What was the mode diagnosis of TB?

- Symptoms only  
 Symptoms and CXR  
 CXR only  
 Sputum positive  
 gene-expert  
 other

Has the child taken INH prophylaxis?

- Yes  
 No

Was there TB treatment before initiation of ART?

- Yes  
 No

What type of TB was diagnosed?

- Pulmonary  
 Disseminated TB  
 Lymphnode TB  
 CNS TB  
 Pleural TB  
 Other

## HOSPITALIZATION

Was the child hospitalized in the past?

- Yes  
 No

If s/he was hospitalized, what was the reason for hospitalization? (be specific)

\_\_\_\_\_

If s/he was hospitalized, How many times?

\_\_\_\_\_

---

---

**DRUG SIDE-EFFECTS (only document yes, if the symptoms appear after initiation of ART and clinicians ascribe it to the drugs)**

- Skin Rash  Yes  
 No
- Nausea or vomiting  Yes  
 No
- feeling generally unwell or extremely tired  Yes  
 No
- muscle or joint ache  Yes  
 No
- swelling of the eye, lips, mouth or face  Yes  
 No
- yellowing of the skin or eyes  Yes  
 No
- Dark urine  Yes  
 No
- Lipodystrophy  Yes  
 No
- Lipid abnormalities and the heart  Yes  
 No
- Anemia  Yes  
 No
- Appetite loss  Yes  
 No
- stomach pain  Yes  
 No
- bloating  Yes  
 No
- Insulin resistance and diabetes  Yes  
 No
- Insomnia  Yes  
 No
- Dizziness, confusion, and sleeping problems  Yes  
 No
- Kidney damage (nephrotoxicity)  Yes  
 No
- Lactic acidosis  Yes  
 No
- Liver damage (hepatotoxicity)  Yes  
 No
- Pancreas damage (pancreatitis)  Yes  
 No

- Peripheral neuropathy (nerve damage)  Yes  
 No
- Diarrhoea  Yes  
 No
- Headache  Yes  
 No
- osteoporis, osteopenia  Yes  
 No
- Thrombocytopenia  Yes  
 No

---

---

**OPPORTUNISTIC INFECTIONS (for this section, use the chart record for the past 6 months as a reference - indicate if the patient has had any of the effects or symptoms at any time in the past 6 months)**

- Asymptomatic  Yes  
 No
- Unexplained persistent hepatosplenomegaly  Yes  
 No
- Persistent generalised lymphadenopathy  Yes  
 No
- Recurrent or chronic upper respiratory tract infections (otitis media, otorrhoea, sinusitis, tonsillitis)  Yes  
 No
- Herpes zoster  Yes  
 No
- Linear gingival erythema  Yes  
 No
- Recurrent oral ulceration  Yes  
 No
- Papular pruritic eruption  Yes  
 No
- Fungal nail infections  Yes  
 No
- Extensive wart virus infection  Yes  
 No
- Extensive molluscum contagiosum  Yes  
 No
- Unexplained persistent parotid enlargement  Yes  
 No
- Unexplained moderate malnutrition not adequately responding to standard therapy  Yes  
 No
- Unexplained persistent diarrhea (14 days or more)  Yes  
 No

- Unexplained persistent fever (above 37.5C, intermittent or constant, for longer than one 1 month)  Yes  
 No
- Persistent oral candidiasis (after first 6 weeks of life)  Yes  
 No
- Oral hairy leukoplakia  Yes  
 No
- Lymph node tuberculosis  True  
 False
- Pulmonary tuberculosis  True  
 False
- Severe recurrent bacterial pneumonia  True  
 False
- Acute necrotizing ulcerative gingivitis or periodontitis  True  
 False
- Unexplained anemia  True  
 False
- Symptomatic lymphoid interstitial pneumonitis (defined as a syndrome of fever, cough, and dyspnea, with bibasilar pulmonary infiltrates consisting of dense interstitial accumulations of lymphocytes and plasma cells)  True  
 False
- Chronic HIV-associated lung disease, including bronchiectasis  True  
 False
- Unexplained severe wasting, stunting or severe malnutrition not responding to standard therapy  True  
 False
- Pneumocystis (jirovecii) pneumonia  True  
 False
- Recurrent severe bacterial infections (such as empyema, pyomyositis, bone or joint infection, meningitis, but excluding pneumonia)  True  
 False
- Chronic herpes simplex infection (orolabial or cutaneous of more than 1 month's duration or visceral at any site)  True  
 False
- Oesophageal candidiasis (or candidiasis of trachea, bronchi or lungs)  True  
 False
- Extrapulmonary tuberculosis  True  
 False
- Kaposi sarcoma  True  
 False
- Cytomegalovirus infection (retinitis or infection of other organs with onset at age more than 1 month)  True  
 False



- Central nervous system toxoplasmosis (after the neonatal period)  True  
 False
- HIV encephalopathy  True  
 False
- Extrapulmonary cryptococcosis, including meningitis  True  
 False
- Disseminated nontuberculous mycobacterial infection  True  
 False
- Progressive multifocal leukoencephalopathy  True  
 False
- Chronic cryptosporidiosis (with diarrhoea)  True  
 False
- Chronic isosporiasis  True  
 False
- Disseminated endemic mycosis (extrapulmonary histoplasmosis, coccidioidomycosis, penicilliosis)  True  
 False
- Lymphoma (cerebral or B-cell non-Hodgkin)  True  
 False
- HIV-associated nephropathy or cardiomyopathy  True  
 False

---



---

**BASELINE LABS**

- Viral Load\_Baseline \_\_\_\_\_
- Absolute CD4 count at Baseline \_\_\_\_\_  
(The CD4 at Baseline)
- CD4 percent at baseline \_\_\_\_\_
- CD8 count \_\_\_\_\_
- CD4/CD8 Ratio \_\_\_\_\_
- White Cell Count \_\_\_\_\_
- Total Lymphocyte Count \_\_\_\_\_
- Hemoglobin \_\_\_\_\_
- Platelet Count \_\_\_\_\_
- Hepatitis B virus surface antigen  Positive  
 Negative
- HCV antibody?  Positive  
 Negative
- Stool Examination \_\_\_\_\_

Urine Analysis

- Normal
- Hematuria (RBC positive)
- Trace proteinuria
- Proteinuria +1 and above
- Pyuria seen

Creatinine

\_\_\_\_\_

BUN

\_\_\_\_\_

SGOT

\_\_\_\_\_

SGPT

\_\_\_\_\_

WHO Stage

- WHO stage 1
- WHO stage 2
- WHO stage 3
- WHO stage 4

---

---

**DISCLOSURE**

Has the child's HIV status been disclosed to them?

- Yes
- No

Has the caregiver disclosed their HIV status to anyone?

- Yes
- No

Whom did the caregiver disclose to?

- partner
- relatives
- their child
